# Supplementary material for: TGFβ receptor inhibition unleashes interferon-β production by tumor-associated macrophages and enhances radiotherapy efficacy
Source: PubMed Central journal article supplement — J Immunother Cancer. 2022 Mar 17;10(3):e003519. doi: 10.1136/jitc-2021-003519 (PMC8932273; doi:10.1136/jitc-2021-003519), 2022-03-17
Supplement: jitc-2021-003519supp001.pdf [file jitc-2021-003519supp001.pdf]

**Supplementary Figure 1: TGF $\beta$ R1 inhibition improves radiotherapy efficacy against head and neck orthotopic tumors.** (A) Quantification of the bioluminescent signal from individual tumors was performed at different time points post treatment in mice treated with the TGF $\beta$ R1 inhibitor LY3200882, RT or RT+ LY3200882 7 days after TC1/Luc inoculation (n = 12-19 mice/group from 2 independent experiments). (B) Kaplan-Meier survival curves. (C) Tumor signals were quantified by bioluminescence *in vivo* imaging 7 days post radiotherapy for each indicated group. For all panels: \*: p<0.05; \*\*\*: p<0.001; \*\*\*\*: p<0.0001; ns: non-significant (B log-rank test, C one-way ANOVA with Tukey's multiple comparison test).

**Supplementary Figure 2: Combination of RT and MT1 modulates tumor vascularization and hypoxia.** (A) Histogram representing the percent of TC1/Luc tumor vascularization, representing the % of the area covered by CD31-positive vessels by IHC for each group. (B) Representative images of the co-staining of CD8 (pink) and CD31 (red) by IHC on head and neck tumors. (C) Histogram shows the density of CAIX+ cells by IHC to quantify hypoxia in the tumors of the different groups. (D) Representative images of the CAIX staining. For A-B, D, n=8-9 mice from 2 independent experiments, \*\*: p<0.01; \*\*\*: p<0.001 (Kruskal-Wallis with Dunn's multiple comparison test).

**Supplementary Figure 3: Immunodeficient mice do not respond to the RT+MT1 combination.** (A) Quantification of the bioluminescent signal from individual tumors was performed at different time points post treatment in immunodeficient nude mice. (B) Kaplan-Meier mouse survival curves. For all panels: n = 7-8 mice/group from one experiment, \*\*\*: p<0.001; \*\*\*\*: p<0.0001.

**Supplementary Figure 4: TGF $\beta$ R2 blockade induce IFN $\beta$  production by macrophages following radiotherapy in head and neck and lung tumor models.** (A) Mice were injected with SCC VII cells at a submucoal site in the inner lip to establish a head and neck model. They were then irradiated and treated with or without MT1 before sacrifice and tumor macrophages sorting (left panel). The right panel represents the quantification of IFN $\beta$  mRNA in the sorted tumor macrophages analyzed by qPCR. (B) Orthotopic lung tumor model was established by transpleural injection of LL2/Luc in the lung. Mice were then irradiated and treated or not with MT1 before sacrifice and macrophage sorting (left panel). The right panel shows the quantification of IFN $\beta$  mRNA in the sorted tumor macrophages analyzed by qPCR. For all panels: \*\*: p<0.01; (Welch's t test).

**Supplementary Figure 5: Anti-IFNAR administration impairs the RT and MT1 combination efficacy.** (A) Quantification of the bioluminescent signal from individual TC1/Luc tumors was performed at different time points post treatment in the different groups treated with anti-IFNAR (IFNAR) antibody or isotype control (IgG) (n = 6-12 mice from 2 independent experiments). (B) Quantification of the tumor vascularization (% of the area covered by CD31-positive vessels) by IHC for each group. (C) Histogram shows the density of CAIX positive cells by IHC to quantify hypoxia in the tumors of the different groups. (D) Kaplan-Meier survival curves of SCC VII head and neck model in the different groups (n=5-12 mice per groups from 2 independent experiments). (E) Kaplan-Meier survival curves of LL2/Luc orthotopic lung tumor model in the different groups (n=4-6 mice per groups from 2 independent experiments). For all panels, \*: p<0.05; \*\*: p<0.01; \*\*\*: p<0.001; \*\*\*\*: p<0.0001 (C one-way ANOVA with Tukey's multiple comparison test, D-E log-rank test).
